# Supplementary material for: Human IAPP is a contributor to painful diabetic peripheral neuropathy
Source: JCI journal article supplement (doi:10.1172/jci156993), 2023-03-14
Supplement: sd1 [file 1]

### Supplemental Data (Online Supplemental Material)

**Table 1.** Clinical characteristics of T2DM patients and non-T2DM controls.

| <b>Characteristic</b>           | <b>Controls<br/>(n=9)</b>  | <b>T2DM<br/>(n=6)</b>      |
|---------------------------------|----------------------------|----------------------------|
| <b>Median age (range) years</b> | 47 (24-67)                 | 59 (58-72)                 |
| <b>Gender (n).</b>              | Female (n=7)<br>Male (n=2) | Female (n=4)<br>Male (n=2) |
| <b>Organ</b>                    | Hand and Foot              | Foot                       |
| <b>Tissue location</b>          | Plantar and Dorsal         | Plantar and Dorsal         |
| <b>Neuropathy</b>               | No                         | Yes                        |

Abbreviations:

T2DM= type 2 diabetes mellitus

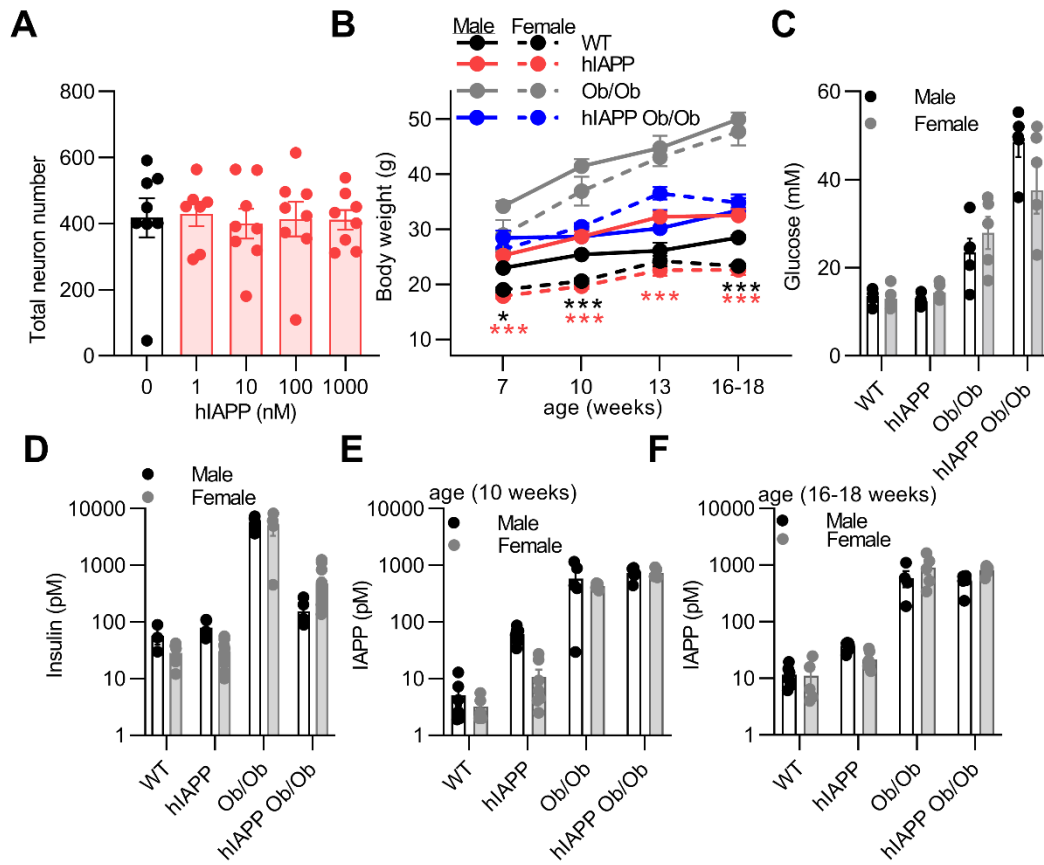

**Supplementary figure 1. Human IAPP incubation with sensory neurons and metabolic parameters in male and female WT, hIAPP, Ob/Ob and hIAPP Ob/Ob mice.** (A) Sensory neurons were cultured and treated for 24h with different concentrations of hIAPP (1-1000nM) or vehicle. The total neuron number was assessed (n=8; n represents a DRG culture of one mouse); ) One-way ANOVA with Tukey's test. (B) Body weight of male mice (WT (n=6), hIAPP (n=15), Ob/Ob (n=16), hIAPP Ob/Ob (n=8) ) and female mice (WT (n=5), hIAPP (n=8), Ob/Ob (n=5), hIAPP Ob/Ob (n=6); Two-way ANOVA with Tukey's test; \*p < 0.05, \*\*p < 0.01, \*\*\*p < 0.001 male vs female. (C) Non-fasting plasma glucose level; (D) Non-fasting plasma insulin levels of male and female mice (C/D; mice age: 16-18 weeks; n=5 and, (E, F) Non-fasting plasma IAPP levels of male mice and female mice; n=5.(C-F) Two-way ANOVA with Sidak's test. Data are presented as mean  $\pm$  SEM.

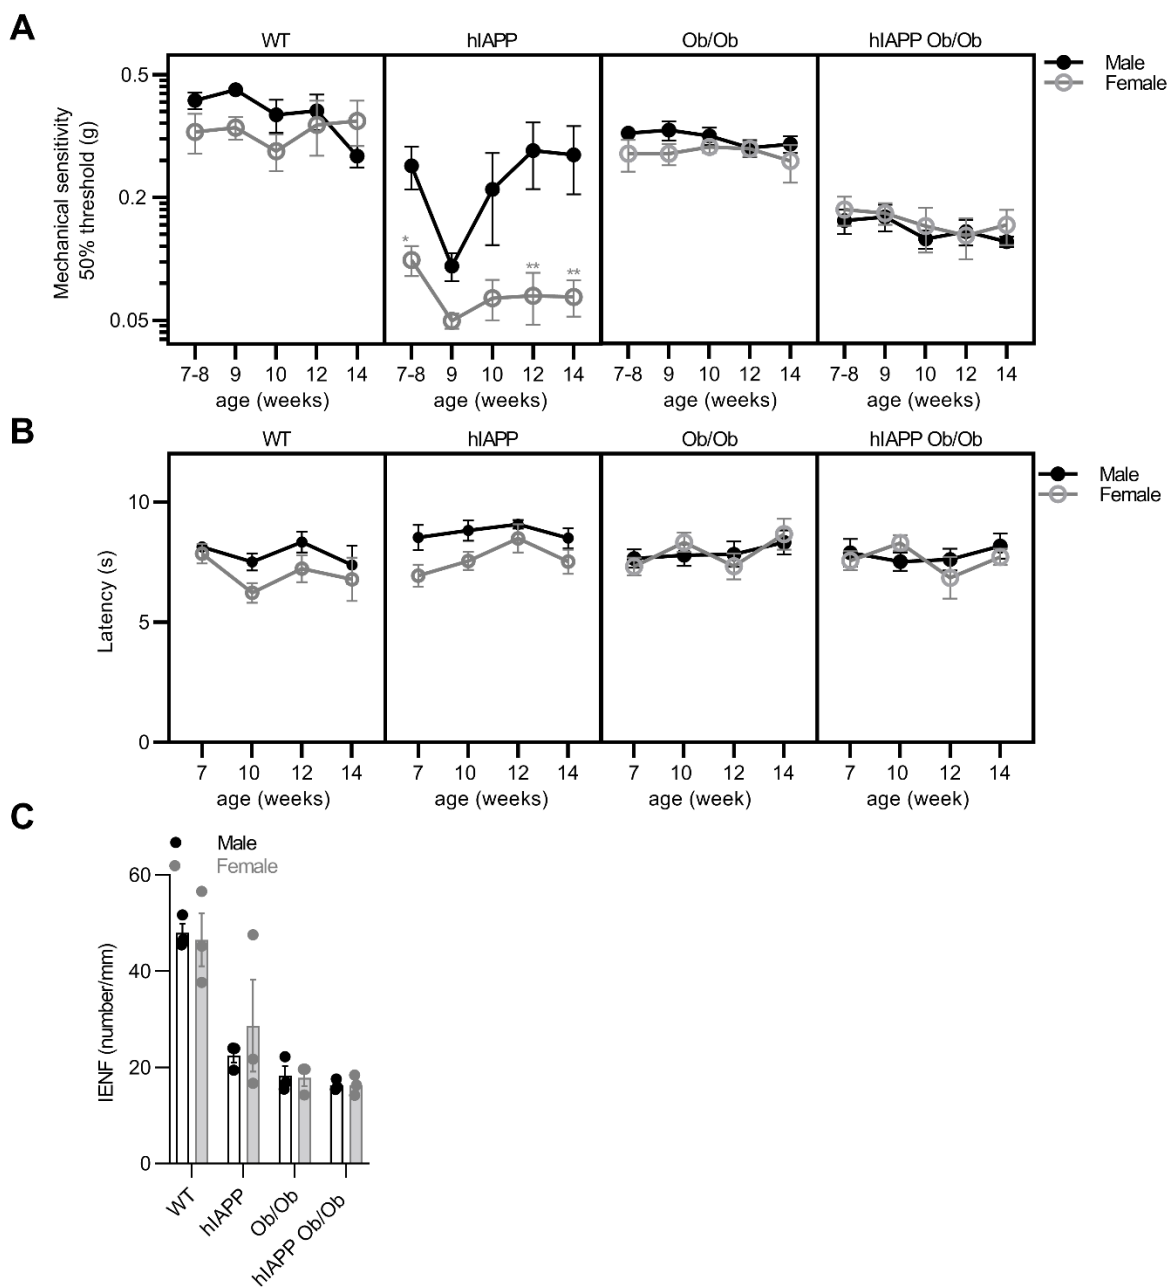

**Supplementary figure 2. Pain behaviour measurements in male and female WT, hIAPP, Ob/Ob and hIAPP Ob/Ob mice.** (A) Mechanical threshold of male mice (WT (n=6), hIAPP (n=15), Ob/Ob (n=16), hIAPP Ob/Ob (n=8)) and female mice (WT (n=5), hIAPP (n=8), Ob/Ob (n=5), hIAPP Ob/Ob (n=6)), Two-way ANOVA with Sidak's test; \*p < 0.05, \*\*p < 0.01 male vs female. (B) Thermal sensitivity of male mice (WT (n=5), hIAPP (n=7), Ob/Ob (n=5), hIAPP Ob/Ob (n=7)) mice and female mice (WT (n=5), hIAPP (n=8), Ob/Ob (n=5), hIAPP Ob/Ob (n=5)); Two-way ANOVA with Sidak's test. (C) Quantification of IENF of the hind paw of male and female mice at 16-18 weeks of age; n=3 for each group; Two-way ANOVA with Sidak's test. Data are presented as mean ± SEM.

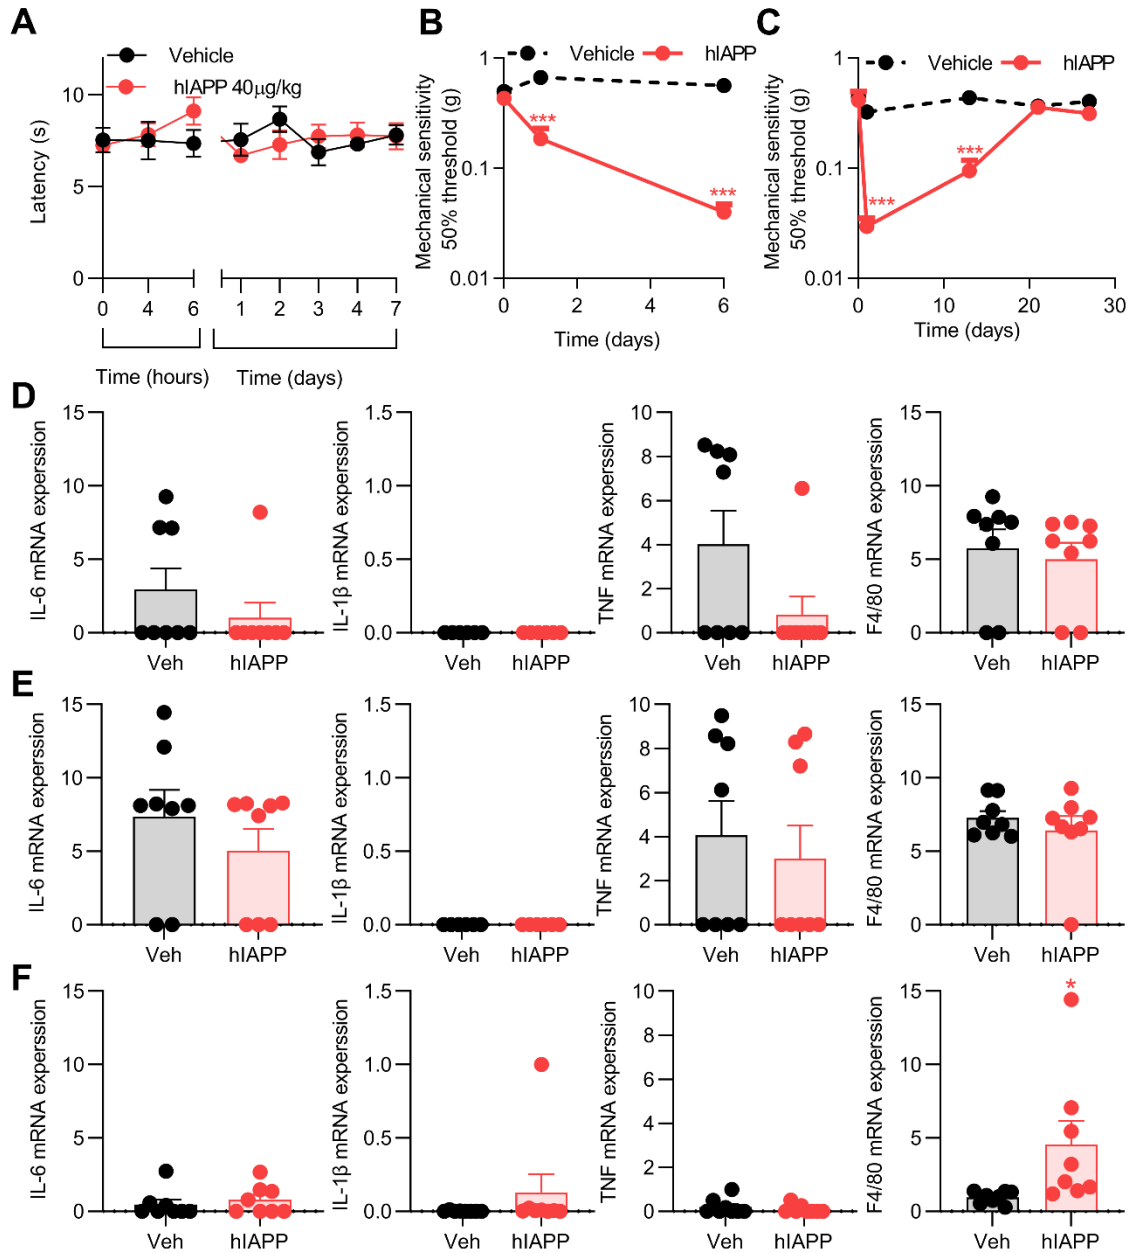

**Supplementary figure 3. Human IAPP injection in the hindpaw (intraplantar) of WT mice did not induce thermal hypersensitivity or trigger expression of inflammatory cytokines.** (A) Thermal sensitivity measured of the hind paw after intravenous injection of hIAPP (40 μg/kg n=6) or saline (NaCl (n=6)) into male WT mice; Two-way ANOVA followed by Sidak's multiple comparison test. (B,C) Mechanical sensitivity of the hind paw after intraplantar injection of hIAPP (1000fg, n=8) or saline (n=8) into male and female WT mice; Two-way ANOVA followed by Sidak's multiple comparison test; \*\*\*P < 0.001. (D-F) IL-6, IL-1β, TNF and F4/80 mRNA expression in hindpaw skin at 6 hours (D), 24 hours (E) and 6 days (F) after intraplantar injection of 1000 fg hIAPP or saline into WT male and female mice. Expression is normalised against housekeeping genes (average of actin, HPRT and 18S); Unpaired t test; \*p<0.05, n=8. Data are presented as mean ± SEM.

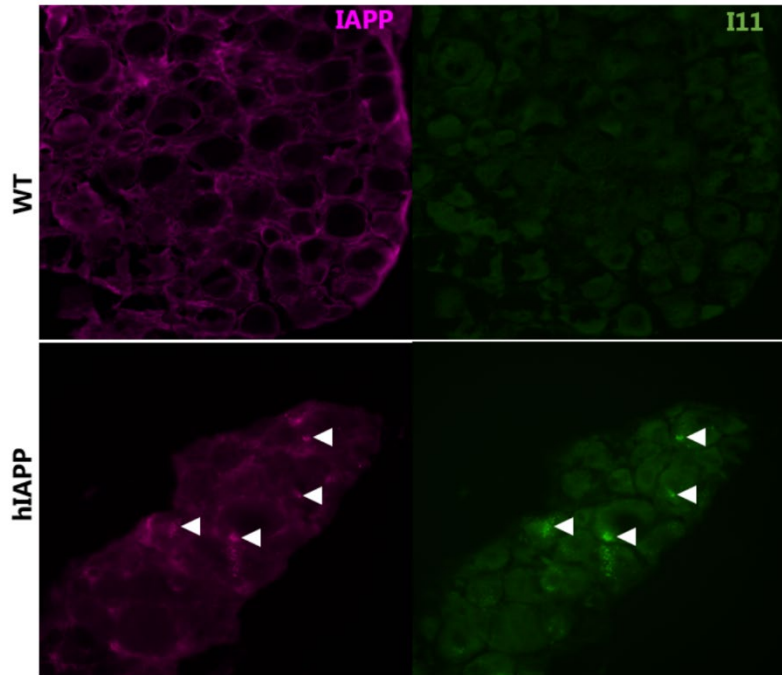

**Supplementary figure 4. hIAPP oligomers present in hIAPP transgenic mice.**

Representative images of the IAPP and oligomer staining (I11) in DRG of WT mice (controls) and hIAPP mice, IAPP and oligomer –positive spots are indicated by the arrowheads.
